# Supplementary material
Source: publisher site journal article supplement (https://www.dovepress.com/article/395944)
Supplement: Supplementary file 1 [file get_supplementary_file.php]

# CHONGQING UNIVERSITY CANCER HOSPITAL

## Pathological Report

### ● General Information

|                                         |                |                           |       |
|-----------------------------------------|----------------|---------------------------|-------|
| Name: -                                 | Gender: Female | Age: 49 years old         | ID: - |
| Department: Department of Breast Center |                | Clinical diagnosis: tumor |       |
| Submitting surgeon's name: -            |                | Date: 01/25/2013          |       |

### ● Gross Appearance

A piece of gray-red skin and muscular tissue, about 7 x 4 x 1.5 cm in size. A gray mass is found near the muscular tissue about 5 cm from the skin. The mass has medium texture, unclear boundary, and no capsule. The cut surface is in gray.

### ● Pathological Diagnosis

**Right chest wall: Squamous cell carcinoma.**

According to the analysis of H&E and IHC images, the pathological diagnosis is considered as breast squamous cell carcinoma with metastasis to the right chest wall.

### ● IHC Results

CK-HMW: (-). CK5/6: (+). P63: (+). P16: (-). TTF1: (-). Ki67: (+), 80%. PCNA: (+), 80%. TOPO II: (+), 40%. MDR1: (-). GST- $\pi$ : (+). ER: (-). PR: (-). C-erbB-2: (-).

- Images

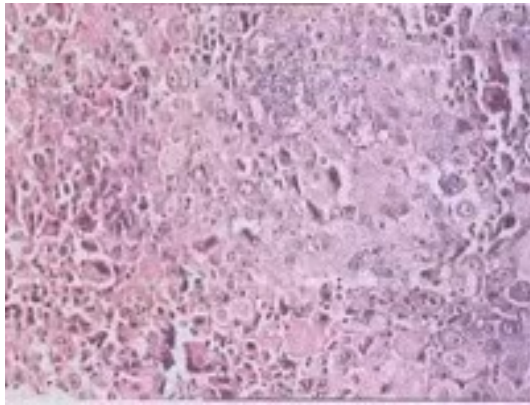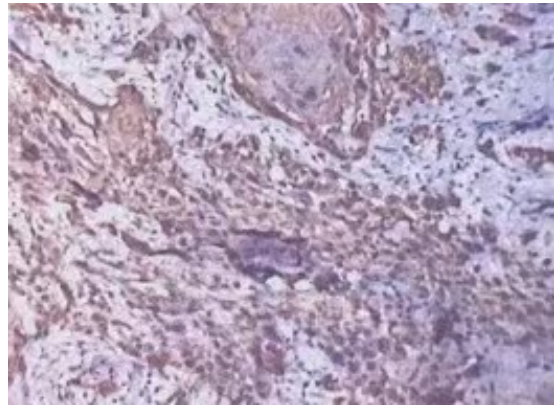

Date of diagnosis: 01/29/2013.

The first pathologist: -

The second pathologist: -
